# Supplementary material for: Frequency of Withdrawal of Life-Sustaining Therapy for Perceived Poor Neurologic Prognosis
Source: PubMed Central journal article supplement — Crit Care Explor. 2021 Jul 13;3(7):e0487. doi: 10.1097/CCE.0000000000000487 (PMC8280080; doi:10.1097/cce.0000000000000487), 2021-07-13
Supplement: cc9-3-e0487-s001.pdf [file cc9-3-e0487-s001.pdf]

Supplemental Material

IRB Names and Numbers

University of Pittsburgh IRB: STUDY #19090180

University of North Carolina IRB: 20-0437

Yale School of Medicine Human Subjects Committee: 2000027565

University of Pennsylvania IRB: 842845
